# Supplementary material
Source: publisher site journal article supplement (https://www.dovepress.com/article/611180)
Supplement: Supplementary file 1 [file Supplementary_FallRisk_SEA_Revised.docx]

**Supplementary Material — TCRM Manuscript ID 611180 (Revised)**

*Manuscript title: Exploring the Current Tools for Fall Risk Assessment in Older Adults Across Southeast Asia and the Need for Culturally Adapted Models — A Scoping Review.*

This file contains: Supplementary Table S1 (complete database search strategies); Supplementary Table S2 (records remaining unobtainable after revision-stage retrieval efforts); and Supplementary Table S3 (Joanna Briggs Institute critical-appraisal screen for the 32 included primary-data studies).

**Supplementary Table S1. Complete Database Search Strategies**

Searches were executed on 8 March 2025 and updated on 18 December 2025. All strategies were limited to publications in English between 1 January 2015 and 31 December 2025. The pre-registration of the search protocol is available on the Open Science Framework: https://doi.org/10.17605/OSF.IO/5DHXK.

| **Database** | **Search string (verbatim)** | **Filters applied** | **Records retrieved** |
| --- | --- | --- | --- |
| PubMed / MEDLINE | Block 1 (concept):  "fall risk"[tiab] OR "falls risk"[tiab] OR "fall prevention"[tiab] OR "fall assessment"[tiab] OR  "Timed Up and Go"[tiab] OR "Berg Balance"[tiab] OR "Morse Fall"[tiab] OR "STEADI"[tiab] OR  "HOME FAST"[tiab] OR "Physiological Profile Assessment"[tiab]  AND  Block 2 (region):  "Southeast Asia"[tiab] OR "ASEAN"[tiab] OR "Thailand"[tiab] OR "Malaysia"[tiab] OR  "Indonesia"[tiab] OR "Vietnam"[tiab] OR "Singapore"[tiab] OR "Philippines"[tiab] OR  "Myanmar"[tiab] OR "Cambodia"[tiab] OR "Lao*"[tiab] OR "Brunei"[tiab] OR "Timor"[tiab]  AND  Block 3 (population):  "older adults"[tiab] OR "elderly"[tiab] OR "aged"[tiab] OR "geriatric"[tiab] | Date 2015–2025; English; full text available | 111 |
| Scopus | TITLE-ABS-KEY(  Block 1 (concept):  "fall risk" OR "fall prevention" OR "fall assessment" OR "timed up and go" OR  "berg balance" OR "morse fall scale" OR "STEADI" OR "HOME FAST"  AND  Block 2 (region):  "Southeast Asia" OR "ASEAN" OR "Thailand" OR "Malaysia" OR "Indonesia" OR  "Vietnam" OR "Singapore" OR "Philippines" OR "Myanmar" OR "Cambodia" OR  "Lao*" OR "Brunei" OR "Timor"  AND  Block 3 (population):  "older adults" OR "elderly" OR "aged" OR "geriatric" ) | Date 2015–2025; English; document type: Article or Review | 56 |
| Web of Science Core Collection | TS=(  Block 1 (concept):  "fall risk" OR "fall prevention" OR "fall assessment" OR "timed up and go" OR  "berg balance scale" OR "morse fall scale" OR "STEADI" OR "HOME FAST" )  AND TS=(  Block 2 (region):  "Southeast Asia" OR "Thailand" OR "Malaysia" OR "Indonesia" OR "Vietnam" OR  "Singapore" OR "Philippines" OR "Myanmar" OR "Cambodia" OR "Lao*" OR  "Brunei" OR "Timor" )  AND TS=(  Block 3 (population):  "older adults" OR "elderly" OR "aged" OR "geriatric" ) | Date 2015–2025; English; categories: Geriatrics & Gerontology, Nursing, General & Internal Medicine | 50 |
| Total records identified | — | — | 217 |
| Duplicate records removed (Rayyan automatic + manual) | — | — | 73 |
| Unique records screened on title and abstract | — | — | 144 |
| Records retained for full-text assessment | — | — | 66 |
| Studies included after full-text assessment | — | — | 32 |

Footnote — Supplementary Table S1. Searches were combined and managed in Rayyan Web (https://rayyan.qcri.org). The same Boolean structure was applied across the three databases with database-specific syntax adjustments. Wildcards (*) were used to capture both Lao and Laos; Lao PDR is the formal designation. No grey-literature or hand-search records were added; therefore the registry-search row is reported as zero in Figure 1.

**Supplementary Table S2. Records Remaining Unobtainable in Full Text After Revision-Stage Retrieval Efforts (n = 3)**

In response to peer-review comment R2-7, eight records that had been excluded for non-open-access at the original full-text screening were re-examined. Five were obtained through institutional library subscription (Universitas Padjadjaran, Universitas Pendidikan Indonesia) or by direct e-mail correspondence with the corresponding authors. Three records remained unobtainable despite repeated attempts and are listed below for transparency. None of the three appeared, on the basis of title and abstract, to alter the substantive conclusions of the review.

| **Record** | **Reason still unobtainable** | **Last action taken** |
| --- | --- | --- |
| Yusoff S, Mohd-Salleh N, Hassan B. Falls among elderly attending primary care clinics in Selangor: a cross-sectional study. Family Medicine & Primary Care Review (in press). [PMID-pending] | Article in press; no DOI yet allocated; institutional subscription pending | E-mail to corresponding author 14 February 2026; no response by 25 April 2026 |
| Khampang P, Sripirom A. Predictive accuracy of a multifactorial fall risk score in Thai community elderly. Songklanagarind Medical Journal. 2018;36(4):245–254. | Journal not indexed in Unpad / UPI subscription packages; full text not available open access | ResearchGate request 12 January 2026; no response |
| Phimphasak C. Comparative validity of fall-risk screens in Northeastern Thai older adults: a cross-sectional study. ASEAN Journal of Public Health (Thai-language abstract; English full text). 2020;5(2):88–97. | Hosted on local server with intermittent availability; no DOI; no English full text traceable | Two e-mail requests (8 March 2025 and 22 January 2026); no response |

Footnote — Supplementary Table S2. These records correspond to the n = 3 “not open access / full text unavailable” exclusions in the lower-right panel of Figure 1.

**Supplementary Table S3. Methodological Quality Screen of Included Primary-Data Studies (n = 32)**

Although the present scoping review followed PRISMA-ScR and JBI scoping-review guidance — which does not mandate formal critical appraisal — we performed an additional descriptive methodological screen in response to peer-review comment R2-6, using the appropriate JBI checklist for each study design (analytical cross-sectional, cohort, randomised controlled trial, quasi-experimental, or diagnostic accuracy). Two reviewers (DD, IP) independently rated each item; disagreements were resolved by discussion. The screen is summarised below by study design and is descriptive only; no studies were excluded on the basis of this screen.

| **Study design** | **n** | **JBI checklist used** | **Domains where most studies were strong (≥ 80% “yes”)** | **Domains where most studies were weak (≤ 40% “yes”)** |
| --- | --- | --- | --- | --- |
| Analytical cross-sectional | 21 | JBI checklist for analytical cross-sectional studies (8 items) | Inclusion-criteria specification; subject and setting description; exposure measurement; outcome measurement; appropriate statistical analysis | Identification and management of confounders; reporting of strategies to address confounding |
| Prospective cohort | 4 | JBI checklist for cohort studies (11 items) | Group similarity at baseline; exposure measurement; outcome measurement; follow-up time appropriate; statistical analysis appropriate | Strategies to address incomplete follow-up; confounder identification and management |
| Randomised controlled trial | 3 | JBI checklist for randomised controlled trials (13 items) | True randomisation; outcome measurement reliability; statistical analysis appropriate | Allocation concealment; blinding of assessors; intention-to-treat analysis (only one trial reported) |
| Quasi-experimental | 1 | JBI checklist for quasi-experimental studies (9 items) | Cause-and-effect temporality; outcome measurement; reliable comparison | Multiple measurements pre-/post-intervention; control group |
| Diagnostic accuracy / development and validation | 3 | JBI checklist for diagnostic-test accuracy studies (10 items) and COSMIN tool for development and validation studies | Reference standard adequately described; index test described in sufficient detail; consecutive or random sample | Time interval between index and reference test; uninterpretable results handling |

Footnote — Supplementary Table S3. The descriptive critical-appraisal screen indicates that the principal methodological vulnerabilities across the body of evidence are (i) the limited identification and statistical management of confounders (most apparent in analytical cross-sectional studies), and (ii) inconsistent reporting of allocation concealment and blinding in randomised trials. These observations are reflected verbatim in the Methodology and Discussion sections of the main manuscript (subsection “Methodological quality of included studies” and “Barriers to adaptation and facilitators of local tool development”).
